# Supplementary material for: Harmonin (Ush1c) is required in zebrafish Müller glial cells for photoreceptor synaptic development and function
Source: PubMed Central journal article supplement — Dis Model Mech. 2011 Jul 14;4(6):786–800. doi: 10.1242/dmm.006429 (PMC3209648; doi:10.1242/dmm.006429), 2011-07-14
Supplement: supp_006429_DMM006429FigS1.pdf [file supp_006429_DMM006429FigS1.pdf]

A

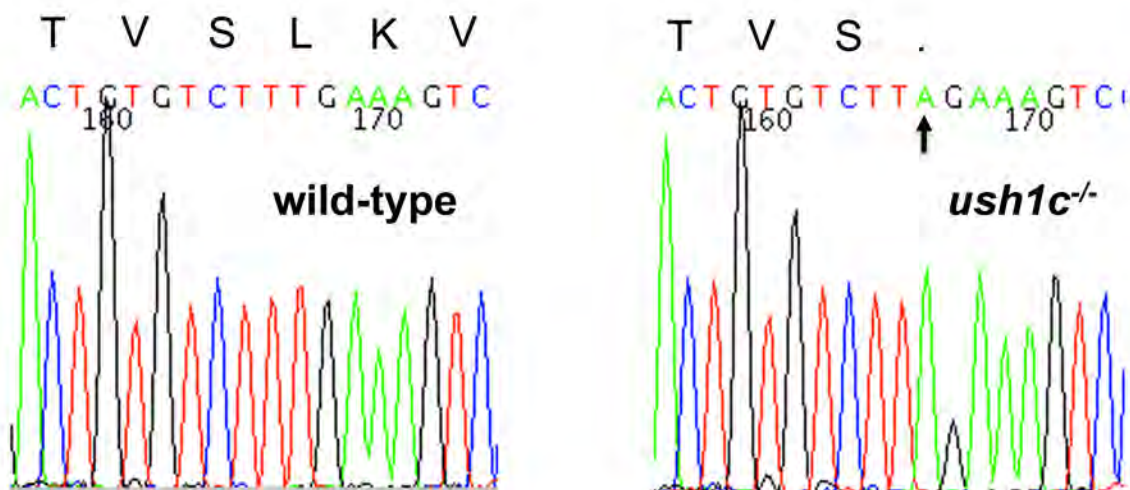

B

*ush1c*Exon1-3control  
*ush1c*Exon1-3morphant

ATGGAAAGAAAAGTGGCCAGGGAATTTCCGCATAAGGTGGAGTTGCTTATTGATAATGAA  
 ATGGAAAGAAAAGTGGCCAGGGAATTTCCGCATAAG-----  
 \*\*\*\*\*

*ush1c*Exon1-3control  
*ush1c*Exon1-3morphant

GCAGAGAAGGACTACCTTTATGATGTTCTTCGCATGTACCATCAATCCATGGACCTGCCT  
 -----ATGGACCTGCCT  
 \*\*\*\*\*

*ush1c*Exon1-3control  
*ush1c*Exon1-3morphant

GTCCTTGTTGGTGACCTGAAGCTGGTAATAAATGAGCCCAAACGCCTTCCTTTGTT  
 GTCCTTGTTGGTGACCTGAAGCTGGTAATAAATGAGCCCAAACGCCTTCCTTTGTT  
 \*\*\*\*\*

C

Translation of exons 1-3

Control:

**M**ERKVAREFRHKVELLIDNEAEKDYLVDV  
 LRMVHQSM DLPVLV GDLKLVINEPKRLPL

Morphant:

**M**ERKVAREFRHKNPWTCLSLLV T.

**Supplemental Data Fig. S1. Analysis of mutant and morphant sequences.**

(A) Partial sequences of wild-type and mutant cDNA sequences, showing the T485A substitution and resulting stop codon. (B) Control cDNA sequence aligned with morphant cDNA sequence showing the deletion of exon 2. (C) Comparison of resulting protein sequences showing multiple stop codons introduced by aberrant splicing in the morpholino. Start codons and f-Met residues are indicated in purple.
